# Supplementary material for: Stress Measured by Allostatic Load Varies by Reason for Immigration, Age at Immigration, and Number of Children: The Africans in America Study
Source: Int J Environ Res Public Health. 2020 Jun 24;17(12):4533. doi: 10.3390/ijerph17124533 (PMC7345091; doi:10.3390/ijerph17124533)
Supplement: Supplementary file 1 [file ijerph-17-04533-s001.pdf]

Supplement Figure 1

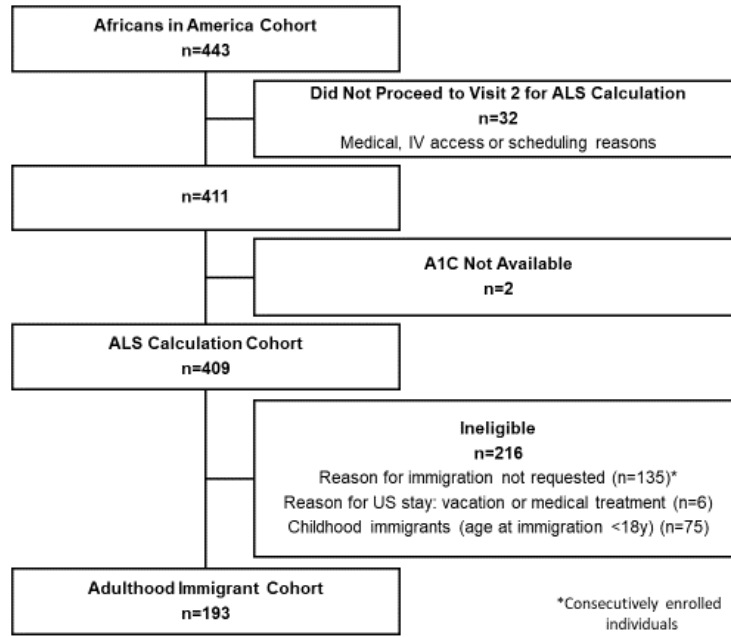

Figure S1. Flow Diagram, Africans in America Cohort.

Table S1: Participant Characteristics by African Region of Origin.

| Parameter <sup>1</sup>                       | Total<br>n = 193<br>100% | West<br>n = 94<br>49% | Central<br>n = 33<br>17% | East<br>n = 66<br>34% | p-value <sup>2</sup> |
|----------------------------------------------|--------------------------|-----------------------|--------------------------|-----------------------|----------------------|
| Male                                         | 65%                      | 68%                   | 70%                      | 58%                   | 0.317                |
| Age (y)                                      | 41±10                    | 41±10                 | 41±12                    | 41±10                 | 0.942                |
| Age at Immigration (y)                       | 31±9                     | 30±8                  | 31±9                     | 32±9                  | 0.213                |
| United States Residence (y)                  | 10±9                     | 11±10                 | 10±9                     | 8±8                   | 0.176                |
| Immigration Reason: High-Stress <sup>3</sup> | 32%                      | 28%                   | 45%                      | 32%                   | 0.169                |
| Number of Children ≥3 <sup>4</sup>           | 28%                      | 24%                   | 29%                      | 34%                   | 0.416                |
| Married                                      | 56%                      | 53%                   | 48%                      | 64%                   | 0.270                |
| College Graduate                             | 79%                      | 87%                   | 70%                      | 71%                   | 0.019                |
| Income ≥40k                                  | 46%                      | 51%                   | 30%                      | 47%                   | 0.118                |
| Health Insurance                             | 68%                      | 70%                   | 64%                      | 68%                   | 0.782                |
| Hemoglobin (g/dL)                            | 14.0±1.5                 | 13.9±1.5              | 14.0±1.3                 | 14.2±1.5              | 0.610                |
| Hematocrit (%)                               | 42.0±4.1                 | 42.0±4.2              | 41.3±4.4                 | 42.4±3.9              | 0.472                |
| Sickle Cell Trait                            | 15%                      | 15%                   | 24%                      | 9%                    | 0.048                |
| Hemoglobin C Trait                           | 3%                       | 5%                    | 0%                       | 0%                    | 0.048                |
| BMI (kg/m <sup>2</sup> )                     | 27.6±4.2                 | 28.1±4.1              | 27.0±4.4                 | 27.1±4.2              | 0.241                |
| Waist Circumference (cm)                     | 91±11                    | 92±11                 | 88±11                    | 91±12                 | 0.232                |
| VAT (cm <sup>3</sup> )                       | 103±66                   | 102±63                | 102±78                   | 104±67                | 0.989                |
| Diabetes                                     | 8%                       | 9%                    | 6%                       | 9%                    | 0.870                |
| 10-year CVD risk (%)                         | 15±17                    | 15±18                 | 18±19                    | 13±16                 | 0.380                |
| Allostatic Load Score                        | 2.50±1.66                | 2.62±1.75             | 2.33±1.73                | 2.42±1.51             | 0.629                |

<sup>1</sup> Data presented as mean±SD or percentages; <sup>2</sup> Comparison by One-Way ANOVA with Bonferroni correction or Chi-square as appropriate; <sup>3</sup> High-Stress reasons were: Work and Asylum-Refugee. Low-Stress reasons were: Study, Family Reunification and Diversity Lottery; <sup>4</sup> Data available for n = 187.

Table S2: Odds of Being in the High-ALS Group by Age at Immigration (Logistic Regression).

|                                                                                       | Odds Ratio | 95% CI     | p-Value |
|---------------------------------------------------------------------------------------|------------|------------|---------|
| <b>Model 1A: Immigration Threshold 30 years &amp; US Residence Threshold 10 years</b> |            |            |         |
| Age at Immigration $\geq 30$ y vs. Age at Immigration $< 30$ y                        | 3.28       | 1.69, 6.36 | <0.001  |
| US Residence $\geq 10$ y vs. US Residence $< 10$ y                                    | 3.16       | 1.61, 6.19 | 0.001   |
| Women vs. Men                                                                         | 1.05       | 0.56, 1.96 | 0.877   |
| <b>Model 1B: Immigration Threshold 30 years</b>                                       |            |            |         |
| Age at Immigration $\geq 30$ y vs. Age at Immigration $< 30$ y                        | 2.18       | 1.22, 3.90 | <0.001  |
| Women vs. Men                                                                         | 1.21       | 0.66, 2.21 | 0.538   |
| <b>Model 2A: Immigration Threshold 40 years &amp; US Residence Threshold 10 years</b> |            |            |         |
| Age at Immigration $\geq 40$ y vs. Age at Immigration $< 40$ y                        | 1.29       | 0.58, 2.87 | 0.540   |
| US Residence $\geq 10$ y vs. US Residence $< 10$ y                                    | 2.12       | 1.16, 3.84 | 0.013   |
| Women vs. Men                                                                         | 1.14       | 0.62, 2.09 | 0.674   |
| <b>Model 2B: Immigration Threshold 40 years</b>                                       |            |            |         |
| Age at Immigration $\geq 40$ y vs. Age at Immigration $< 40$ y                        | 1.08       | 0.50, 2.37 | 0.839   |
| Women vs. Men                                                                         | 1.24       | 0.69, 2.25 | 0.475   |
| <b>Model 3A: Immigration Threshold 50 years &amp; US Residence Threshold 10 years</b> |            |            |         |
| Age at Immigration $\geq 50$ y vs. Age at Immigration $< 50$ y                        | 1.16       | 1.29, 4.54 | 0.836   |
| US Residence $\geq 10$ y vs. US Residence $< 10$ y                                    | 2.06       | 1.15, 3.72 | 0.016   |
| Women vs. Men                                                                         | 1.14       | 0.62, 2.10 | 0.666   |
| <b>Model 3B: Immigration Threshold 50 years</b>                                       |            |            |         |
| Age at Immigration $\geq 50$ y vs. Age at Immigration $< 50$ y                        | 1.00       | 0.26, 3.87 | 0.997   |
| Women vs. Men                                                                         | 1.24       | 0.68, 2.25 | 0.478   |

Table S3: Odds of Being in the High-ALS Group by Number of Children (Logistic Regression).

|                                          | Odds Ratio | 95% CI     | P-Value |
|------------------------------------------|------------|------------|---------|
| <b>Model 1: Family Responsibilities</b>  |            |            |         |
| Children $\geq 1$ vs. No Children        | 1.95       | 1.00, 3.80 | 0.050   |
| Married vs. Not Married                  | 0.83       | 0.44, 1.56 | 0.562   |
| Women vs. Men                            | 1.24       | 0.66, 2.34 | 0.498   |
| <b>Model 2A: Family Responsibilities</b> |            |            |         |
| Children $\geq 2$ vs. No Children        | 1.91       | 0.94, 3.91 | 0.075   |
| Married vs. Not Married                  | 0.81       | 0.40, 1.62 | 0.542   |
| Women vs. Men                            | 1.47       | 0.74, 2.89 | 0.279   |
| <b>Model 3A: Family Responsibilities</b> |            |            |         |
| Children $\geq 3$ vs. No Children        | 2.67       | 1.17, 6.09 | 0.019   |
| Married vs. Not Married                  | 0.81       | 0.34, 1.88 | 0.621   |
| Women vs. Men                            | 1.55       | 0.67, 3.57 | 0.303   |
